# Supplementary material for: Similarity of multicomponent nanomaterials in a safer-by-design context: the case of core–shell quantum dots
Source: Royal Society of Chemistry journal article supplement (doi:10.1039/d3en00338h), 2024-01-01
Supplement: d3en00338h1.pdf [file d3en00338h1.pdf]

Supporting Information for

# Similarity of Multicomponent Nanomaterials in a Safer-by-Design context: the case of Core-shell Quantum Dots

Veronica Di Battista<sup>a,b\*</sup>, Karla R. Sanchez-Lievanos<sup>a,c\*</sup>, Nina Jeliaskova<sup>d</sup>, Fiona Murphy<sup>e</sup>, Georgia Tsiliki<sup>f,g</sup>, Alex Zabeo<sup>h</sup>, Agnieszka Gajewicz-Skretna<sup>i</sup>, Alicja Mikołajczyk<sup>i,j</sup>, Danail Hristozov<sup>k</sup>, Vicki Stone<sup>e</sup>, Otmar Schmid<sup>l</sup>, Neil Hunt<sup>m</sup>, Agnes G. Oomen<sup>n,o</sup>, Wendel Wohlleben<sup>a</sup>

<sup>a</sup>Department of Analytical and Material Science and Department of Experimental Toxicology and Ecology, BASF SE, Ludwigshafen, Germany

<sup>b</sup>DTU, Department of Environmental and Resource Engineering, Kgs. Lyngby, Denmark.

<sup>c</sup>Department of Chemistry, University of Rochester, Rochester, New York 14627, United States

<sup>d</sup>Ideaconsult Ltd., 4 Angel Kanchev St, 1000 Sofia, Bulgaria

<sup>e</sup>Heriot-Watt-University, Edinburgh, UK

<sup>f</sup>Athena Research Center, AthensArtemidos 6 & Epidavrou, 15125, Marousi, Greece,

<sup>g</sup>Purposeful IKE, 144 Triths Septemvriou, 11251, Athens, Greece

<sup>h</sup>GreenDecision, Venice, Italy

<sup>i</sup>Laboratory of Environmental Chemoinformatics, Faculty of Chemistry, University of Gdansk (UG), Gdansk, Poland

<sup>j</sup>QSAR Lab Sp. z o. o., Trzy Lipy 3, 80-172, Poland

<sup>k</sup>Emerge, Sofia, Bulgaria

<sup>l</sup>Institute of Lung Health and Immunity, Helmholtz Center Munich – German Center for Environmental Health, 85764 Neuherberg/Munich, Germany

<sup>m</sup>The REACH center Lancaster

<sup>n</sup>National Institute for Public Health and the Environment (RIVM), Bilthoven, the Netherlands

<sup>o</sup>Institute for Biodiversity and Ecosystem Dynamics, University of Amsterdam (UvA), the Netherlands

## Contents

|                                                                                                                                                                                                                                                                                                                                                                                                                                                                                                                                                                                     |   |
|-------------------------------------------------------------------------------------------------------------------------------------------------------------------------------------------------------------------------------------------------------------------------------------------------------------------------------------------------------------------------------------------------------------------------------------------------------------------------------------------------------------------------------------------------------------------------------------|---|
| <b>Figure S1.</b> Dissolution setup. ....                                                                                                                                                                                                                                                                                                                                                                                                                                                                                                                                           | 2 |
| <b>Figure S2.</b> Time-resolved dissolution kinetics of QDs in pH7.4 Gamble's or "LSF" medium. ....                                                                                                                                                                                                                                                                                                                                                                                                                                                                                 | 3 |
| <b>Figure S3.</b> Fluorescence emission spectra of ZnCuInS, ZnCuInS-COOH-L and ZnCdSeS in water. ....                                                                                                                                                                                                                                                                                                                                                                                                                                                                               | 3 |
| <b>Figure S4.</b> (A) Comparison between the two descriptors Dissolved ion % and leachable mass % in PSF, obtained from one week abiotic dissolution, for all metallic elements from the 5 QDs. ZnO and CuO materials are included for benchmarking. (B)Schematic representation of the two descriptors reported in (A). Changes in %wt are reported and shown to be minimal. Grey dots represent the remaining %wt of each QDs constituted by polymer. All dissolution experiments were done in duplicates with an average standard deviation at each sampling point of 1-3%. .... | 4 |
| <b>Figure S5.</b> Flow diagram showing the relevant questions to be answered for predicting hazard endpoints in physiological media, here addressed using Tier 1 in chemico data and considered for similarity assessment and grouping analysis. ....                                                                                                                                                                                                                                                                                                                               | 5 |
| <b>Figure S6.</b> Representative TEM micrographs of the 5 QDs under study prior and after incubation for 168 h in PSF. The scale bar represents 10 nm. ....                                                                                                                                                                                                                                                                                                                                                                                                                         | 6 |
| <b>Figure S7.</b> WOWA approach similarity analysis with respect to Mass specific surface area and diameter. ....                                                                                                                                                                                                                                                                                                                                                                                                                                                                   | 7 |
| <b>Table S2.</b> Composition of phagolysosomal (PSF) and lung simulant fluids (LSF) (in g) for 5L of Nanopure H <sub>2</sub> O at 37°C. ....                                                                                                                                                                                                                                                                                                                                                                                                                                        | 9 |

|                                                                                                                                                                                                                                                                                            |    |
|--------------------------------------------------------------------------------------------------------------------------------------------------------------------------------------------------------------------------------------------------------------------------------------------|----|
| <b>Table S3.</b> Examples of international occupational exposure limits in air for some elements of concern in commercially available QDs. These OELs are set by regulatory authorities considering the available data on carcinogenicity, mutagenicity and toxicity to reproduction. .... | 9  |
| <b>Table S4.</b> Properties derived from the present study and main categorization outcomes for the QDs family .....                                                                                                                                                                       | 10 |

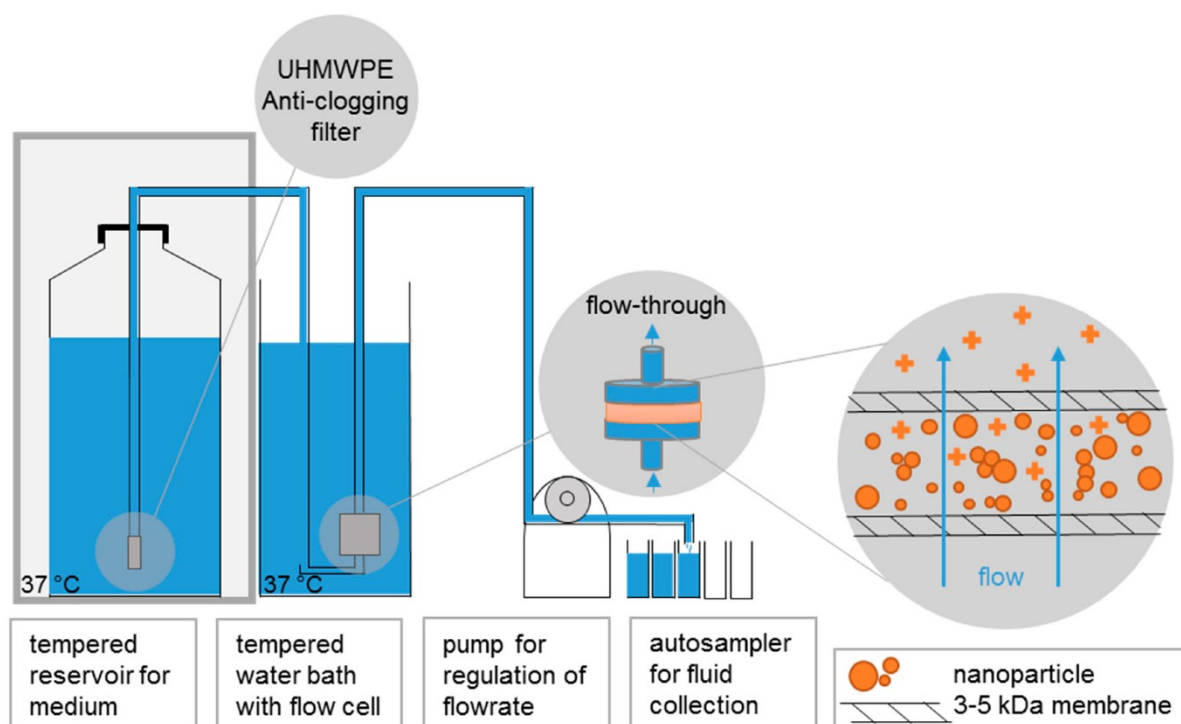

**Figure S1.** Dissolution setup. Reproduced with permission of reference <sup>1</sup>.

We investigate the dissolution kinetics of QDs under the PSF environment previously developed by NIOSH because the acidic lysosomal condition (<pH4.5) can be used to best predict the biodissolution behavior of inhaled nanomaterials. Additionally, we use the recommended ISO standard (ISO/TR19057, 2017) for non-lysosomal conditions as a complementary medium that mimics the pH 7.4 condition of extracellular lung fluid. This fluid contains strong metal-ion chelator citrate ligands to mimic the organic constituents (lipids, proteins) of the natural fluids (Table S1). We acknowledge that for some metal-based nanomaterials, this medium may exaggerate their potential to dissolve and transform, but since cellular uptake and subsequent lysosomal dissolution is considered one of the main pathways of metal-induced toxicity, the structural transformation should be maximized for our methodical purpose to evaluate transformation as potential criteria for hazard grouping.

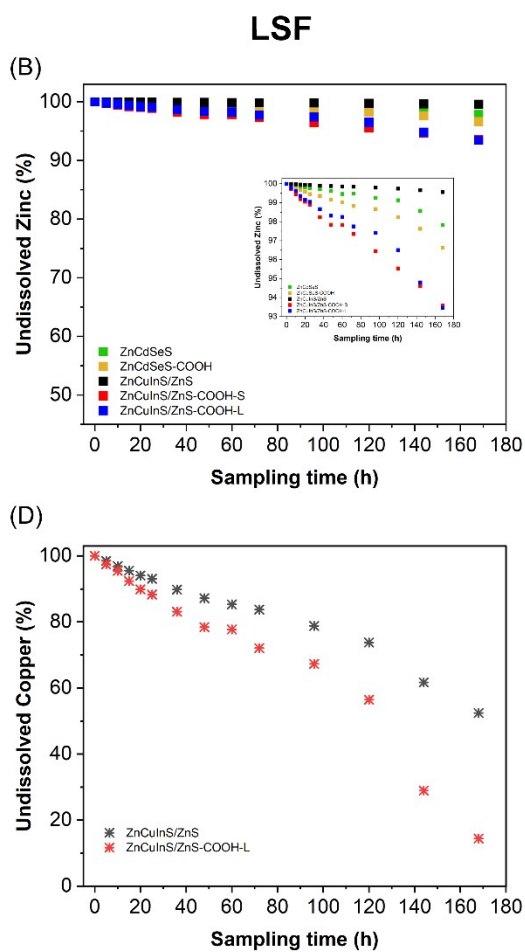

**Figure S2.** Time-resolved dissolution kinetics of QDs in pH7.4 Gamble's or "LSF" medium.

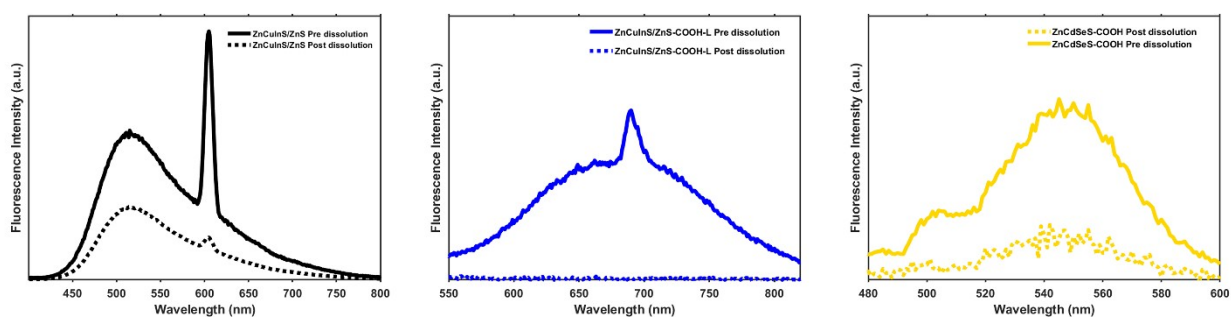

**Figure S3.** Fluorescence emission spectra of ZnCuInS, ZnCuInS-COOH-L and ZnCdSeS in water.

(A)

| Dissolved ion%:<br>% of the single metal component<br>which turns into ions  | %Zn  | %Cd     | %Se  | %Cu  | %In  |
|------------------------------------------------------------------------------|------|---------|------|------|------|
| ZnCuInS/ZnS                                                                  | 2.3  |         |      | 41.5 | 0.2  |
| ZnCuInS/ZnS-COOH-S                                                           | 27.9 |         |      | 86.3 | 3.9  |
| ZnCuInS/ZnS-COOH-L                                                           | 51.4 |         |      | 42.1 | 7.2  |
| ZnCdSeS                                                                      | 3.9  | 0.004   | <LOD |      |      |
| ZnCdSeS-COOH                                                                 | 1.3  | 0.1     | <LOD |      |      |
| ZnO                                                                          | 88.1 |         |      |      |      |
| CuO                                                                          |      |         |      | 96.3 |      |
| Leachable mass%:<br>% out of the initial loaded mass<br>that turns into ions | %Zn  | %Cd     | %Se  | %Cu  | %In  |
| ZnCuInS/ZnS                                                                  | 0.4  |         |      | 0.1  | 0.02 |
| ZnCuInS/ZnS-COOH-S                                                           | 0.4  |         |      | 0.02 | 0.01 |
| ZnCuInS/ZnS-COOH-L                                                           | 0.8  |         |      | 0.08 | 0.03 |
| ZnCdSeS                                                                      | 1.3  | 0.00042 | <LOD |      |      |
| ZnCdSeS-COOH                                                                 | 0.4  | 0.02    | <LOD |      |      |
| ZnO                                                                          | 70.4 |         |      |      |      |
| CuO                                                                          |      |         |      | 77.1 |      |

(B)

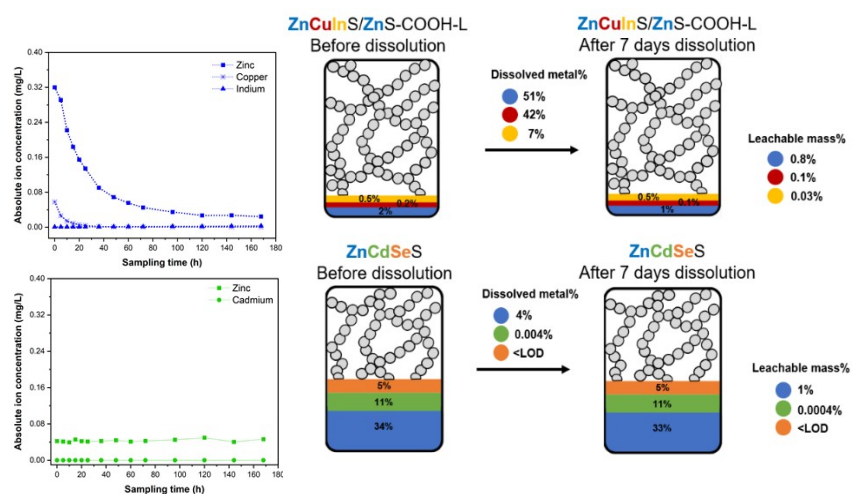

**Figure S4.** (A) Comparison between the two descriptors Dissolved ion % and leachable mass % in PSF, obtained from one week abiotic dissolution, for all metallic elements from the 5 QDs. ZnO and CuO materials are included for benchmarking. (B) Schematic representation of the two descriptors reported in (A). Changes in %wt are reported and shown to be minimal. Grey dots represent the remaining %wt of each QDs constituted by polymer. All dissolution experiments were done in duplicates with an average standard deviation at each sampling point of 1-3%.

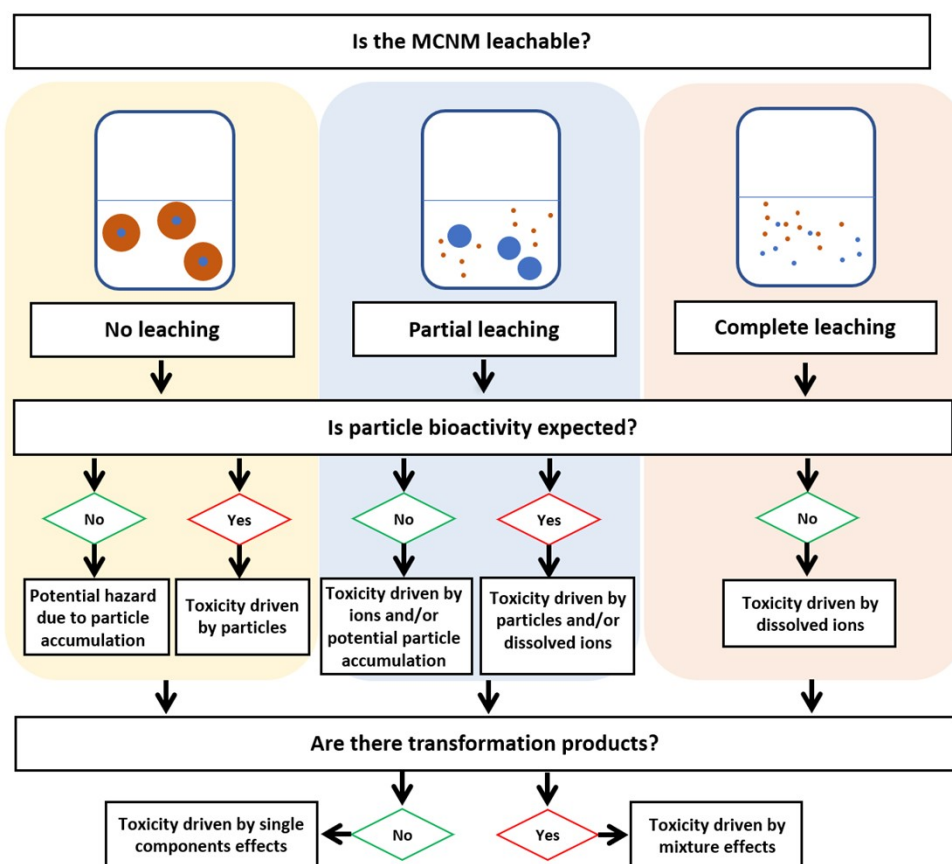

**Figure S5.** Flow diagram showing the relevant questions to be answered for predicting hazard endpoints in physiological media, here addressed using Tier 1 in chemico data and considered for similarity assessment and grouping analysis.

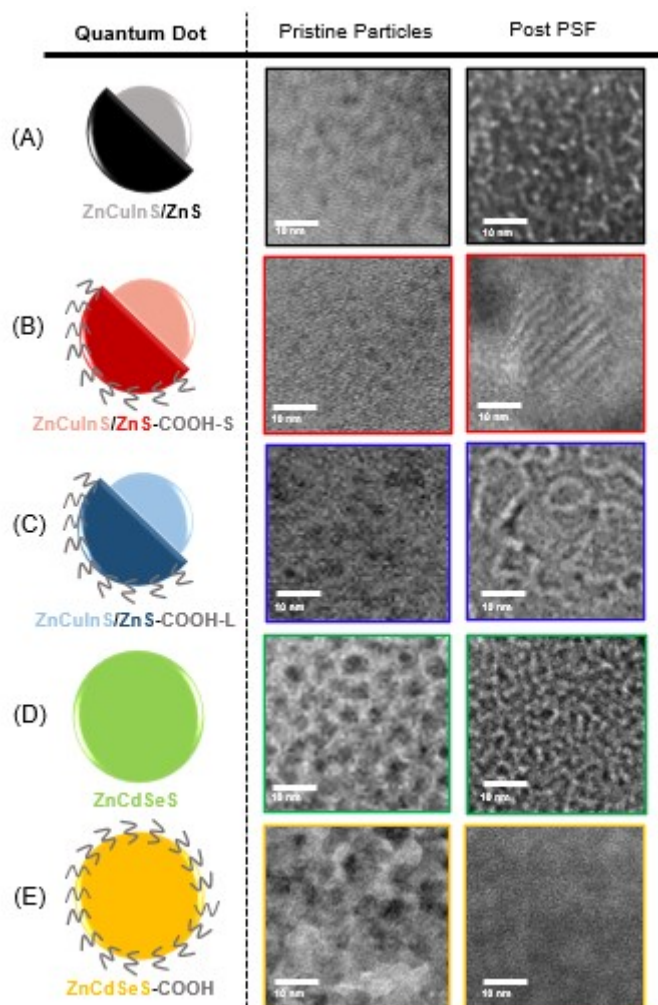

**Figure S6.** Representative TEM micrographs of the 5 QDs under study prior and after incubation for 168 h in PSF. The scale bar represents 10 nm.

Figure S6 showcases the fluorescence emission spectra of the other three QDs, where ZnCuInS/ZnS retains its optical properties, ZnCuInS/ZnS-COOH-L shows no substantial trace of PL, and ZnCdSeS-COOH, because of low recovered amounts, presents a discernable low signal-to-noise ratio emission spectrum. We investigated the transformation of structural details after abiotic testing. Figure S6 contains representative TEM micrographs of both pristine and post-dissolution (in PSF) QDs. We found traces of QDs only in the ZnCuInS/ZnS and ZnCdSeS cases. The other samples contained mostly Zn and S as trace elements. All the TEM grids with post-dissolution hydrophilic QDs contained other elemental traces (Na, Ca, K, Mg, and Cl) from the PSF medium. After performing EDXS on the post-dissolution ZnCuInS/ZnS QD, no copper traces could be found, which agrees with the results from the dissolution experiment, where up to 42% of the copper ion content within the sample had leached. The initial content of copper was initially significantly low (0.31%wt), confirming that its substantial leaching led to its barely detectable amount. Figure S6B displays a shift towards larger crystallite diameters on post-dissolution ZnCuInS/ZnS-COOH-S QDs. This observation can be explained by assuming the Ostwald ripening model, in which the minimization of interfacial energy is achieved by the dissolution of small crystals and - mediated by the minimal ion's solubility

- subsequent redeposition of the dissolved species on the surfaces of larger crystals. Despite finding traces of all the elemental components, the TEM micrograph scope area in Fig. S6B, did not show any photoluminescence at all, which can be associated with the resulting enlarged crystallites that deviate from the quantum confinement size regime. Figures S6C and S6E post-dissolution micrographs show amorphous deposited material with lower content of all the elements of interest within ZnCuInS-COOH-L and ZnCdSeS-COOH (EDX prior-/after dissolution), suggesting partial dissolution of QDs. The lack of crystalline structure is associated with the observed loss of photoluminescence.

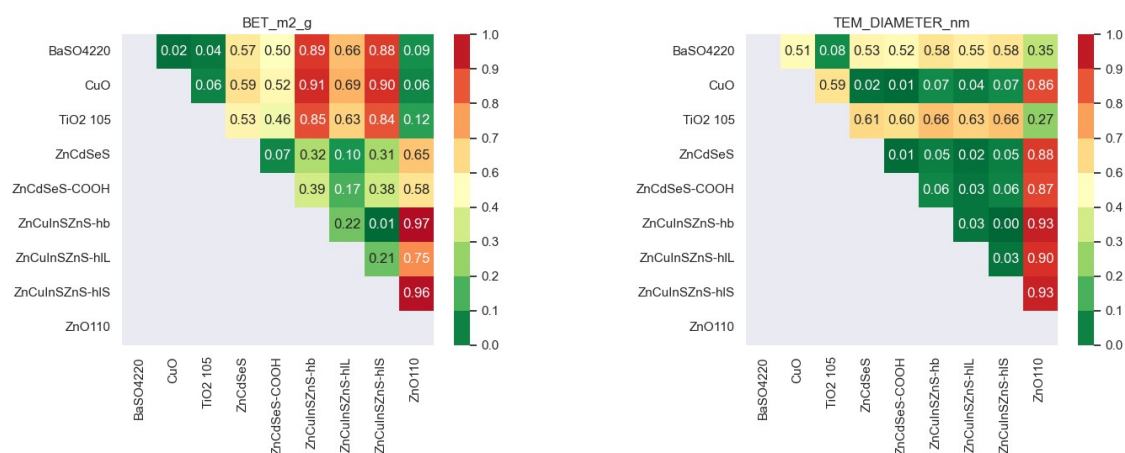

**Figure S7.** WOVA approach similarity analysis with respect to Mass specific surface area and diameter.

**Table S1.** Overview of QDs physicochemical properties. The size of QDs was calculated based on one representative TEM image including 200-300 particles. Values were confirmed with those reported on [www.plasmachem.com](http://www.plasmachem.com). The Surface area was calculated from the particle size and the respective density available on the producer website. ([www.plasmachem.com](http://www.plasmachem.com))

| Code name                 | Reference number <sup>a</sup> | Minimum external dimension (nm) <sup>b</sup> | Shape <sup>a</sup> | Elemental composition (%wt) <sup>c</sup> | Mass-specific Surface Area from TEM (m <sup>2</sup> /g) | Surface chemistry <sup>d</sup>                                                                                                                                          |
|---------------------------|-------------------------------|----------------------------------------------|--------------------|------------------------------------------|---------------------------------------------------------|-------------------------------------------------------------------------------------------------------------------------------------------------------------------------|
| <b>ZnCuInS/ZnS</b>        | PL-QD-CF-530-100mg            | 3.3                                          | Isotropic spheres  | Zn:19.2<br>Cu:0.31<br>In:9.03            | 255                                                     | O: 3.78 ±0.43,<br>C: 93.92 ±0.44,<br>N: 2.30 ±0.20                                                                                                                      |
| <b>ZnCuInS/ZnS-COOH-S</b> | PL-QD-WCF-530-100mg           | 3.4                                          | Isotropic spheres  | Zn:1.46<br>Cu:0.02<br>In:0.34            | 247                                                     | B: 7.90 ±3.39,<br>O: 27.97±3.08,<br>C: 53.53±8.75,<br>Na: 8.06 ±1.66,<br>Cl: 1.37 ±1.19                                                                                 |
| <b>ZnCuInS/ZnS-COOH-L</b> | PL-QD-WCF-700-100mg           | 4.6                                          | Isotropic spheres  | Zn:1.58<br>Cu:0.21<br>In:0.46            | 183                                                     | B: 3.12 ±1.64,<br>O: 19.52± 1.67,<br>C: 70.64 ±3.29,<br>Na: 6.05 ±0.10,<br>Cl: 0.37 ±0.36                                                                               |
| <b>ZnCdSeS</b>            | PL-QD-OA-530-100mg            | 5.7                                          | Isotropic spheres  | Zn:33.87<br>Cd:10.58<br>Se:5.69          | 147                                                     | C: 63.83 ±2.25,<br>O: 9.41 ±1.63,<br>Zn: 12.95 ±0.37,<br>Cd: 0.76± 0.06,<br>Se: 0.79± 0.26,<br>S: 12.26 ±1.45<br>Likely overestimated because of Se 3p-S2p overlapping. |
| <b>ZnCdSeS-COOH</b>       | PL-QD-WA-530-100mg            | 5.2                                          | Isotropic spheres  | Zn:32.73<br>Cd:20.47<br>Se:7.09          | 162                                                     | B: 11.19 ± 1.85,<br>O: 40.48 ±1.92,<br>C: 35.20 ±4.13,<br>Na: 11.12 ±0.80,<br>Cl: 2.02 ±0.21                                                                            |

<sup>a</sup>PlasmaChem

<sup>b</sup>Experimentally characterized by TEM

<sup>c</sup>Experimentally characterized by ICPMS

<sup>d</sup>Experimentally characterized by XPS

**Table S2.** Composition of phagolysosomal (PSF) and lung simulant fluids (LSF) (in g) for 5L of Nanopure H<sub>2</sub>O at 37°C

| <i>Substance</i>                                | <i>PSF</i> | <i>LSF</i> |
|-------------------------------------------------|------------|------------|
| Na <sub>2</sub> HPO <sub>4</sub>                | 0.710      |            |
| NaHPO <sub>4</sub>                              |            | 0.630      |
| NaCl                                            | 33.250     | 30.095     |
| Na <sub>2</sub> SO <sub>4</sub>                 | 0.355      | 0.315      |
| CaCl <sub>2</sub> · 2H <sub>2</sub> O           | 0.145      | 1.840      |
| Glycine                                         | 2.250      |            |
| KH-Phthalate                                    | 20.423     |            |
| Alkylbenzyltrimethylammonium<br>chloride (ABDC) | 0.250      |            |
| NaN <sub>3</sub>                                | 0.100      | 0.100      |
| MgCl <sub>2</sub> · 6H <sub>2</sub> O           |            | 0.924      |
| KCl                                             |            | 1.490      |
| NaHPO <sub>4</sub>                              |            | 0.630      |
| Sodium acetate                                  |            | 2.870      |
| NaHCO <sub>3</sub>                              |            | 13.020     |
| Na <sub>3</sub> Citrate · 2H <sub>2</sub> O     |            | 0.485      |

**Table S3.** Examples of international occupational exposure limits in air for some elements of concern in commercially available QDs. These OELs are set by regulatory authorities considering the available data on carcinogenicity, mutagenicity and toxicity to reproduction.

| Element | Regulation Dossier Limit / OEL (mg/m <sup>3</sup> ) |
|---------|-----------------------------------------------------|
| Cu      | 1 <sup>a</sup>                                      |
| Zn      | 5 <sup>b</sup>                                      |
| In      | 0.1 <sup>c</sup>                                    |
| Cd      | 1.8x10 <sup>-6</sup> <sup>d</sup>                   |

<sup>a</sup>WHO/OSHA<sup>b</sup>REACH/ECHA<sup>c</sup> REACH/ECHA<sup>d</sup>US EPA

**Table S4.** Properties derived from the present study and main categorization outcomes for the QDs family

| QDot               | Leaching         | MAK scaled leaching    | Particles Reactivity               | Ions reactivity | Transformation product                 | Hypothesis                                                                        |
|--------------------|------------------|------------------------|------------------------------------|-----------------|----------------------------------------|-----------------------------------------------------------------------------------|
| ZnCuInS/ZnS        | Partial leaching | Low                    | Low particles reactivity at 1 g/L  | Yes             | No.<br>Retains optical properties.     | Potential hazard due to particle accumulation and dissolved ions                  |
| ZnCuInS/ZnS-COOH_S | Partial leaching | Low                    | Low particles reactivity at 1 g/L  | Yes             | Yes.<br>No trace of optical properties | Potential hazard due to particles accumulation and mixture effects                |
| ZnCuInS/ZnS-COOH_L | Partial leaching | Low                    | Low particles reactivity at 1 g/L  | Yes             | Yes.<br>No trace of optical properties | Potential hazard due to particle accumulation, dissolved ions and mixture effects |
| ZnCdSeS            | Partial leaching | High<br>Presence of Cd | High particles reactivity at 1 g/L | No              | No.<br>Retains optical properties.     | Toxicity driven by particles                                                      |
| ZnCdSeS-COOH       | Partial leaching | High<br>Presence of Cd | Low particles reactivity at 1 g/L  | No              | No.<br>Retains optical properties.     | Potential hazard due to particle accumulation                                     |

## References

- (1) Keller, J. G.; Peijnenburg, W.; Werle, K.; Landsiedel, R.; Wohlleben, W. Understanding Dissolution Rates via Continuous Flow Systems with Physiologically Relevant Metal Ion Saturation in Lysosome. *Nanomaterials* **2020**, *10* (2), 311.
